# Supplementary material
Source: HighWire-hosted journal article supplement (https://jnis.bmj.com/content/11/6/579)
Supplement: inline-supplementary-material-1 [file inline-supplementary-material-1.docx]

**Supplemental Table 1.** Baseline characteristic of study population (n=224)

| **Variables** | **Apollo-Assisted Minimally Invasive Endoscopic Hematoma Evacuation (n=19)** | **Medical Management (n=205)** | **P-Value** |
| --- | --- | --- | --- |
| Age (mean ± SD), years | 51 ± 11 | 58 ± 13 | 0.026 |
| ESRD baseline, % | 5.3% | 3.4% | 0.514 |
| Admission ICH volume (median, IQR), cm3 | 40 (25–51) | 9 (3–18) | <0.001 |
| IVH extension, % | 42.1% | 55.6% | 0.337 |
| ICH score (mean ± SD), points | 2.1 ± 0.8 | 1.7 ± 1.4 | 0.291 |
| NIHSS admission (median, IQR), points | 21 (18–24) | 11 (4–17) | 0.017 |
| Female sex, % | 26.3% | 39.3% | 0.329 |
| Hypertension, % | 86.8% | 84.2% | 0.850 |
| Diabetes mellitus, % | 21.1% | 34% | 0.314 |
| Congestive heart failure, % | 8.9% | 10.5% | 0.684 |
| Prior stroke, % | 21.1% | 19.2% | 0.768 |
| Hyperlipidemia, % | 26.3% | 23.6% | 0.781 |
| Antiplatelet pretreatment, % | 31.6% | 24.9% | 0.582 |
| Statin pretreatment, % | 10.5% | 20.4% | 0.380 |
| Glucose baseline (median, IQR), mg/dL | 140 (111–260) | 120 (100–169) | 0.425 |
| LDL baseline (median, IQR), mg/dL | 89 (73–106) | 106 (77–128) | 0.133 |
| SBP baseline (median, IQR), mmHg | 202 (180–229) | 190 (161–223) | 0.245 |
| DBP baseline (median, IQR), mmHg | 124 (95–140) | 109 (93–128) | 0.178 |

**Abbreviations:** DBP=diastolic blood pressure; ESRD=end-stage renal disease; ICH=intracerebral hemorrhage; IVH=intraventricular hemorrhage; IQR=interquartile range; LDL=low density lipoprotein; NIHSS=National Institute of Health Stroke Scale; SB=systolic blood pressure; SBP=diastolic blood pressure; SD=standard deviation.
